# Supplementary material for: Advanced Technologies Conciliating Desulfurization and Denitrogenation to Prepare Clean Fuels
Source: MDPI journal article supplement (doi:10.3390/catal14020137), 2024-02-09
Supplement: s1 [file s1]

**Table S1.** Reported results obtained for simultaneous ADS and AND of fuels oils.

| Adsorbent                                                   | Adsorption conditions |                |        |                     |                                       | T (°C) | Time       | mg S                 | mg N                   | Ref. |
|-------------------------------------------------------------|-----------------------|----------------|--------|---------------------|---------------------------------------|--------|------------|----------------------|------------------------|------|
|                                                             | S /ppm                | S compound     | N /ppm | N compound          | Amount Adsorbent                      |        |            | adsorbed/g adsorbent | adsorbed/g adsorbent   |      |
| Activated Carbon (AC)                                       |                       |                |        |                     | 1:28 mass of adsorbent to mass of oil |        |            | 5.8                  | 5.6                    |      |
| (NH <sub>4</sub> ) <sub>2</sub> S <sub>2</sub> O treated AC | 5268                  | DBT            | 520    | QUI; IND; Carbazole |                                       | r.t    | 24 h       | 5.1                  | 6.6                    | 69   |
| Fe NP impregnated AC                                        | 50                    | DBT; 4,6-DMDBT | 1000   | QUI; IND            | -                                     | 25     | 10-15 days | 3.33                 | 11.5                   | 71   |
| Oxidized hollow mesoporous carbon nanospheres               | 1400                  | -(Real Diesel) | 800    | Real Diesel         | 0.25 g                                | 150    | 25 h       | 14                   | 27                     | 76   |
| Y zeolite                                                   |                       |                |        |                     |                                       |        |            |                      | 3.1                    |      |
| Cerium-exchanged Y zeolite                                  | -                     | -              | 1845   | IND                 | 1 g                                   | 30     | 24 h       | -                    | 23.1                   | 87   |
| Silica–zirconia co-gel                                      |                       |                |        |                     |                                       |        |            | -                    | 3.71                   |      |
| Spherical mesoporous silica (YSP-1)                         | 8200                  | -(LGO)         | 190    | -(LGO)              | -                                     | 30     | -          | 5.99                 | 8.14                   | 90   |
| Zr-Spherical mesoporous silica (YSP-2)                      |                       |                |        |                     |                                       |        |            | 7.74                 | 8.05                   |      |
| Li-YSP                                                      | 430                   | DBT            | 271    | 9-methylcarbazole   | 75 mg                                 | 45     | 48 h       | 0.17                 | 8.13                   | 91   |
| MIL-101(Cr)                                                 | -                     | -              | 498    | -(LCO)              | 10 mg                                 | r.t.   | 16 h       | -                    | 19.6                   | 94   |
| MIL-100(Cr)                                                 |                       |                |        |                     |                                       |        |            | 4.3                  | 29.43                  |      |
| Ethylenediamine grafted MIL-100(Cr)                         | 400                   | BT             | 400    | QUI; IND            | 10 mg                                 | -      | 1 h        | 3.4                  | 8.62                   | 95   |
| Aminomethanesulfonic acid grafted MIL-100(Cr)               |                       |                |        |                     |                                       |        |            | 4.6                  | 32.7                   |      |
| MIL-125                                                     |                       |                |        |                     |                                       |        |            |                      | 16.2 (QUI); 8.3 (IND)  |      |
| MIL-125-NH <sub>2</sub>                                     | -                     | -              | 1000   | QUI; IND            | 5 mg                                  | 25     | 1 h        | -                    | 35.6 (QUI); 27.4 (IND) | 96   |
| Protonated MIL-125-NH <sub>2</sub>                          |                       |                |        |                     |                                       |        |            |                      | 49.7 (QUI); 55.3 (IND) |      |
| UiO-66                                                      |                       |                |        |                     |                                       |        |            |                      | 14.2 (QUI); 14.3 (IND) |      |
| UiO-66-NH <sub>2</sub>                                      |                       |                |        |                     |                                       |        |            |                      | 12.4 (QUI); 17.6 (IND) |      |
| Protonated UiO-66-NH <sub>2</sub>                           | -                     | -              | 1000   | QUI; IND            | 5 mg                                  | 20     | 6 h        | -                    | 23.0 (QUI); 26.8 (IND) | 98   |
| UiO-66-OH <sub>2</sub>                                      |                       |                |        |                     |                                       |        |            |                      | 19.8 (QUI); 25.3 (IND) |      |

**Table S2.** Reported results obtained for simultaneous ODS and ODN of fuel oils.

| Catalyst                                                             | Oxidant                       | Temp. (°C) | Time (min) | S-compound | S <sub>removal</sub> (%) | N-compound                     | N <sub>removal</sub> (%) | Ref. |
|----------------------------------------------------------------------|-------------------------------|------------|------------|------------|--------------------------|--------------------------------|--------------------------|------|
| Limonite                                                             | H <sub>2</sub> O <sub>2</sub> | 25         | 180        | DBT        | 100                      | Quinoline                      | 60                       | 122  |
| PMoV/Fe <sub>3</sub> O <sub>4</sub> /g-C <sub>3</sub> N <sub>4</sub> | H <sub>2</sub> O <sub>2</sub> | 80         | 160        | DBT        | 100                      | Indole<br>Quinolone<br>Pyrrole | >80                      | 123  |

|                                                                                |                               |    |     |                            |        | Pyridine            |       |     |
|--------------------------------------------------------------------------------|-------------------------------|----|-----|----------------------------|--------|---------------------|-------|-----|
| Mn-Co-Mn/Al <sub>2</sub> O <sub>3</sub>                                        | NaClO                         | 35 | 20  | BT                         | 75     | Pyridine            | 100   | 129 |
|                                                                                |                               |    |     | DBT                        | 100    | Indole              | 85-90 |     |
|                                                                                |                               |    |     | 4,6-DMDBT                  | 95-100 | Carbazole           | 90-95 |     |
| Mn <sub>3</sub> O <sub>4</sub> /GO                                             | NaClO                         | 25 | 2   | DBT                        | 100    | Pyridine            | 100   | 133 |
|                                                                                |                               |    |     | 4,6-DMDBT                  | 89     | Indole              | 83    |     |
|                                                                                |                               |    |     | BT                         | 85     | Carbazole           | 81    |     |
| MnO <sub>2</sub> /UiO(Zr)-66                                                   | NaClO                         | 25 | 3   | DBT                        | 100    | Pyridine            | 100   | 134 |
| [BMIM]PMO <sub>12</sub> /ZIF-8                                                 | H <sub>2</sub> O <sub>2</sub> | 75 | 60  | BT, DBT, 4-MDBT, 4,6-DMDBT | 90     | Pyridine, Quinoline | 90    | 120 |
| [Gd(H <sub>4</sub> nmp)(H <sub>2</sub> O) <sub>2</sub> ]Cl · 2H <sub>2</sub> O | H <sub>2</sub> O <sub>2</sub> | 70 | 120 | BT, DBT, 4-MDBT, 4,6-DMDBT | 88     | Pyridine, Quinoline | 100   | 119 |
| TBAPMO <sub>12</sub> Cu/CuO                                                    | H <sub>2</sub> O <sub>2</sub> | 35 | 60  | Thiophene                  | 97     | Pyridine            | 99    | 138 |
|                                                                                |                               |    |     | DBT                        | 98     | Carbazole           | 98    |     |
| PWV <sub>5</sub> /TMA-Si                                                       | H <sub>2</sub> O <sub>2</sub> | 70 | 60  | BT                         | 80     | Quinoline           | 100   | 139 |
|                                                                                |                               |    |     | DBT                        | 100    |                     |       |     |
|                                                                                |                               |    |     | 4,6-DMDBT                  | 90     |                     |       |     |
| LaW <sub>10</sub> /LDHs                                                        | H <sub>2</sub> O <sub>2</sub> | 65 | 80  | BT                         | 99     | Quinoline,          | 99    | 140 |
|                                                                                |                               |    | 45  | DBT                        | 100    | Pyridine,           | 99    |     |
|                                                                                |                               |    | 90  | 4,6-DMDBT                  | 99     | Indole              | 99    |     |
| H <sub>3</sub> PMO <sub>12</sub> @MOF-808                                      | H <sub>2</sub> O <sub>2</sub> | 70 | 60  | BT                         | 88     | Quinoline,          | 100   | 136 |
|                                                                                |                               |    |     | DBT                        | 99     | Indole              | 100   |     |
|                                                                                |                               |    |     | 4-MDBT                     | 60     |                     |       |     |
| H <sub>3</sub> PMO <sub>12</sub> @MIL-100(Fe)                                  | H <sub>2</sub> O <sub>2</sub> | 70 | 30  | BT                         | 92     | Quinoline, Indole   | 100   | 137 |
|                                                                                |                               |    |     | DBT                        | 100    |                     |       |     |
|                                                                                |                               |    |     | 4-MDBT                     | 100    |                     |       |     |
|                                                                                |                               |    |     | 4,6-DMDBT                  | 98     |                     |       |     |

**Table S3.** Reported results obtained for photocatalytic processes for desulfurization (PODS) and denitrogenation (PODN) of fuel oils.

|                                                                 | Irradiation   | Oxidant                       | Compounds              |                       | Removal efficiency       |                          | Time (min) | T (° C) | Reused times | Ref. |
|-----------------------------------------------------------------|---------------|-------------------------------|------------------------|-----------------------|--------------------------|--------------------------|------------|---------|--------------|------|
|                                                                 |               |                               | PODS                   | PODN                  | PODS                     | PODN                     |            |         |              |      |
| CuOrod/MW W                                                     | UV-C          | H <sub>2</sub> O <sub>2</sub> | BT                     | IND                   | 97.67%                   | 99.99%                   | 75         | 60      | 5            | 141  |
| Na(0.3)-CN                                                      | visible light | molecular O <sub>2</sub>      | Th                     | Py                    | 461.6 µg g <sup>-1</sup> | 402.1 µg g <sup>-1</sup> | 360        | RT      | 4 for PODN   | 142  |
| Ti <sub>3</sub> C <sub>2</sub> /g-C <sub>3</sub> N <sub>4</sub> | Visible light | atmospheric O <sub>2</sub>    | Th                     | Py                    | 270.7 µg g <sup>-1</sup> | 245.2 µg g <sup>-1</sup> | 360        | 0       | 6            | 143  |
| 30PW <sub>12</sub> /Ce-NUiO-66                                  | Visible light | Molecular O <sub>2</sub>      | DBT                    | Qu                    | 89%                      | 99%                      | 90         |         | 4            | 144  |
| Er/W-N-TiO <sub>2</sub>                                         | Visible light | H <sub>2</sub> O <sub>2</sub> | Th, BT, DBT, 4,6-DMDBT | Qu, IND and carbazole | 100%                     | 100%                     | 25         | 70      | 10           | 145  |
| Ir/Pr-N-CQDs-TiO <sub>2</sub>                                   | ultraviolet   | H <sub>2</sub> O <sub>2</sub> | BT, DBT, 4,6-DMDBT     | Qu, IND and carbazole | 99.8%                    | 95.5%                    | 50         | 100     | 11           | 146  |
